# Supplementary material for: NIR-responsive magnesium phosphate cement loaded with simvastatin-nanoparticles with biocompatibility and osteogenesis ability
Source: Royal Society of Chemistry journal article supplement (doi:10.1039/d4ra01079e), 2024-01-01
Supplement: d4ra01079e1.pdf [file d4ra01079e1.pdf]

**NIR-responsive magnesium phosphate cement loaded simvastatin- nanoparticles  
with biocompatibility and osteogenesis ability**

Bin Wang<sup>a,1</sup>, Yanbin Zhao<sup>b,c,1</sup>, Yangyang Li<sup>b,c</sup>, Junyan Yao<sup>b,c</sup>, Shunjie Wu<sup>a</sup>,  
Guoping Miu<sup>a,\*</sup>, Chenglin Chu<sup>b,c,\*</sup>

<sup>a</sup> *Department of Orthopedics, Rudong People's Hospital, Nantong, 226400, Jiangsu, China*

<sup>b</sup> *School of Materials Science and Engineering, Southeast University, Nanjing, 211189, China*

<sup>c</sup> *Jiangsu Key Laboratory for Advanced Metallic Materials, Southeast University, Nanjing, 211189, China*

\* Corresponding author.

Email address: [miuguoping@163.com](mailto:miuguoping@163.com) (G.P. Miu), [clchu@seu.edu.cn](mailto:clchu@seu.edu.cn) (C.L. Chu),

<sup>1</sup> Bin Wang and Yanbin Zhao contributed equally to this article.

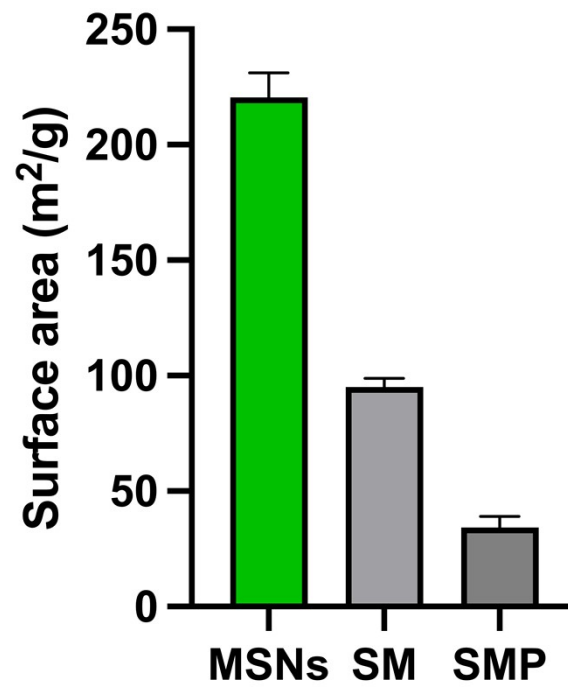

Fig. S1 Surface areas of MSNs, SM, and SMP nanoparticles.
